# Supplementary material for: Molecular dynamics simulation of four typical surfactants in aqueous solution
Source: PubMed Central journal article supplement — RSC Adv. 2019 Jan 24;9(6):3224–31. doi: 10.1039/c8ra09670h (PMC9059947; doi:10.1039/c8ra09670h), 2019-01-24
Supplement: RA-009-C8RA09670H-s001.pdf [file RA-009-C8RA09670H-s001.pdf]

## Molecular Dynamics Simulation of Four Typical Surfactants in Aqueous Solution

Peng Shi<sup>a,b</sup>, Hui Zhang<sup>a,1</sup>, Lin Lin<sup>a</sup>, Chunhui Song<sup>a</sup>, Qingguo Chen<sup>a,2</sup>, Zesheng Li<sup>c</sup>

<sup>a</sup> *College of Material Science and Engineering & College of Chemical and Environmental Engineering, Harbin University of Science and Technology, Harbin 150080, People's Republic of China*

<sup>b</sup> *College of Chemical Engineering, Harbin Institute of Petroleum, Harbin 150028, People's Republic of China*

<sup>c</sup> *Key Laboratory of Cluster Science of Ministry of Education & School of Chemistry, Beijing Institute of Technology, Beijing 100081, People's Republic of China*

---

<sup>1</sup>Corresponding author: Fax: +86-451-86390148; e-mail: [hust\\_zhanghui11@hotmail.com](mailto:hust_zhanghui11@hotmail.com).

<sup>2</sup>Corresponding author: Fax: +86-451-86391601; e-mail: [qgchen@263.net](mailto:qgchen@263.net).

## **Figure Captions**

Figure S1 Four surfactant initial structures

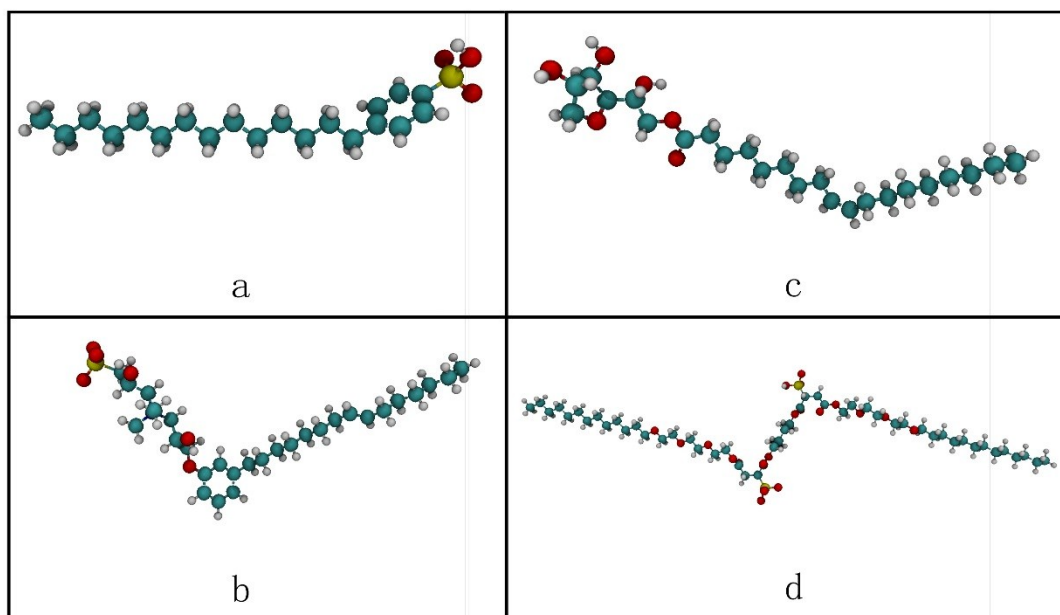

Figure S1 Four surfactant initial structures(a represent the structure of anionic surfactants, b represent the structure of zwitterion surfactants, c represent the structure of nonionic surfactants, d represent the structure of gemin surfactants,where yellow represents sulfur, red represents oxygen, cyan represents carbon, gray represents hydrogen, and blue represents nitrogen).
